# Supplementary material
Source: PubMed Central journal article supplement (PMC3912548)

## Ah receptor antagonism attenuates growth factor expression, proliferation and migration in fibroblast-like synoviocytes from rheumatoid arthritis patients.

Tejas S. Lahoti, Jarod M. Hughes, Ann Kusnadi, Kaarthik John, Bokai Zhu, Iain A. Murray, Krishne Gowda, Jeffrey M. Peters, Shantu G. Amin and Gary H. Perdew

### Journal of Pharmacology and Experimental Therapeutics

**Supplementary Figure 1.** Genomic sequences spanning the indicated regions for human epiregulin (EREG), amphiregulin (AREG) and vascular endothelial growth factor A (VEGFA) were obtained from the NCBI gene database. Putative dioxin response elements (DREs), which match the consensus sequence are highlighted in green, while those which deviate from the consensus sequence are highlighted in red. Deviations from the consensus DRE sequence are marked as lowercase. The core invariant region is underlined.

#### Human AREG -1552/-384 sequence

-1552

```
CAACAAATGTGGAATAGAAGGCATGATTCATGATTATTTTCATTCTACTAAATGCATGATATTATTTGGAC
tACGCACTgTgATATACCATTAAAAATAAGTGATTTTTTAAAAAAAATTTCAGAAATTAGGACAGATGCA
CTGTgACTCACGtTATTATTATTATTATTATTATTATTATTATTATTATTATTATTATTATTGAGTCGGAGTCT
TGCTCTATCACCCATGATGGAGTACAGTGGCATGACCTTGGCTCACTGCAACGTCTGCCTCCCGGGTTCA
AGGGAGTCTCCTGCCTCAGCCACCCGAGTAGCTGGGACTACAGGCGCGCGCcATCACGCCCAGCTAATT
TCCTTTGTATTTTTAGTAAAGATGGGGTTTTGCCATCTTGCCAGGCTGCTCTCGAACTCCTGACCTCAG
GTGATCCACCCGCCTCGGCTTCCCaaAGTGCTGGGATTACAGGCATGAGCCACTGCGCCTGGCCTGACCT
ACATTCTTAAAAGGGCTGTGTTACTGAAACAATCAGGAAAGAATCATATCTCCAGGTGAAGGAAAATGAA
CAATGCTTTTTCTCTTCTCAAGTCAAGAAAAATCCAGTTCTTTAGTTGACAGTACATCCAAGTTAGTCA
AATTAAGTAGCTTCTGTCTCCGCTTCATTTTATCTACTTGTCTATGATTAAATATCCTACTAGGTTGTAA
GTGGGCCCTCAACGTGACCTTTTTATCTTGGGATTTGAGAGGCACAGTCTAGAGCACTActCTTCACCT
AAATGCCAGTATGCCACCAGTAGAAATTATCCTTTAGGCTAAATATTGTTCTTCCAGAAACCCTCTTTT
CAAGGATCAGTTTTAAACCTAAATTCATCAGAGAGGAAAACAGCAGATTTTCAGAGTCAGATGAAGAATTCA
TATCCACCTGGCTTTGAACATTATCGGCTGTGAGATGGTGTAGGTAAAATTTTAAGTGCATAATTGGCA
ATAATAAATCATCAATAAATATTAATGTTGATGAGGCCCTGGGCCACATAAAGAAATAGGGAGTGAGGG
GATTTGAAATCTGGCCACTTCACAGAAATGGGTGGGAAGGGGCTCTTGATTGAGATAGAAGCCCATCCT
ACATGAAGCAATTCCTCATTGAGTTCTCTCGTCCTTTATCCTTGTTGGA-384
```

**Human EREG -1996/-160 Sequence**

-1996

AGCACTAACTCGGTACTAGGCACCTCTACTAAGCACTTTTCATTATTTTCCTATGCGCTGGATACTATTATTATCCCTG  
TTTTACGTATGAGGAAATTGAGACAGATTAAATAACTTGTCCAGGAATTCACACACAGACAGTTTAAATCTTAACCC  
CTGATAACATGATGAAGTATTTGTTTCTTTTTTTTTTTTTTTTTTGGAGACGGAGTTTCGCTCTGTCGCCAGGCTGGAG  
TGCAGTGGCGCGATCTCGACTCACTGCAAGCTCCGCCTCCCGGgtTCACGCCATTCTCCTGCCTCAGCCTCCCGTGT  
AGCTGGGACTACAGGCGCGGCCACCATGCCCGCTAATTTTTGTATTTTAGTAGAGACGGGGTTTCACTGTGTTA  
TCCAGGATGGTCTCGATCTCCTGAcCTCGTGATccGCTCGTCTCGGCCTCCCAAAGTGCTGGGATTACaGGCGTGAG  
ccACCGCGCCCGGCCGAAGTATTTGTTTCTAACAAAGAGCATTCTGGACATTAAAGGGCCTTAGAGTATGAGAGAAAA  
AAGCCAGAAAAAAGGAATAGTAATAATAATTTTTTAAAAAGTAGAAATAAAAAGGTAAGGAGTTAATCCAT  
TAGATTCCATTTTCTATTCAAATATGTATATTTACATACAGTACTGCTGAATTGACTCACAGTTCTTAGGTCCTATA  
GAGGAGTGCAGTGAAAAGGAAGACAATTTACACAGTACAGAGCTGAACATAGGACTTACAAACAAAAAAGTCAA  
GGAATACAAAGTAGCTTTCCAGGTGTAAAGTACCGGGTCTAGAATTCTATGAGGCTAGGGAGAAGATAAACGACAA  
AAGCTATAAGAGATCAGAATGAAAAGAGATCCACAAGCCTAAGAAGCCCAGGCCCTTGAGGAGAACCATGAATTTGA  
GCAGGATTTCACTAATTCCTTTAAAAAGTAGCCATTGCCTCAAAGTACGACTCCATCAGCATAGGCAGGAAAGTGGG  
AGTGAGGAAAGGCTTAGAGTTTTCCAGCCTGGCTGGGGTCAGACAATTTGCCTGGGGAAATAGTGGGAGCTGAGGTT  
GAAAAGACCGATTGGCTTCACGTTTTGTGGCAGGCCTTGTCAAAAAGCAATAGGAAGTCGTTGAAAGGTTTTGTGCA  
GGGGAGCGACAGGATTAAGGCACACTTAGTAGGAAGTCATATCAAAAGCAGCAACCTGACAAATGGCAAATACGAC  
AGAAGGAAAAAATAACAGGAATTTCTTCACAATGACTCGACTTTGAGGTAATAAATGCCTGAGCCACATTGGAA  
GCAGGGTCTCAGAAGGAAGGCGCAGATGGGAAGGCTTTTCTGGGCGGTGGCGTTTCAATGCAAGGAGGGCGCTTG  
AATCACTGACAGACTTCAAGTTAAGGGAGTTTCGTGgctTGAGGTTAGTAagTCaCACGCACAGCTCTCCAAAGGCA  
TGTATGGGGAACGCCAGCCTTGGCTAAAAGACTGATTCAAGTTATGTCCGTCACCCTGAGCAACCAAAACCCAC  
TACAGGGCAGGTGACCCACAAAGCAAACCAAGCCATCTGGTCCACGCTCCCCACCTCCCGAGGGAGATGGAAAAG  
TTTCGGGAGTAGTCCCCGGCCAATCGGAAAGACATTTTTTCATTCTCAACCAC<sup>-160</sup>



**Human VEGFA -2010/+1043 Sequence**

-2010

AGAGGCGCACAAAGGAGGAAAGTTAGTGGCTTCCCTTCCATATCCCGTTCATCAGCCTAGAGCATGGAGCC  
CAGGTGAGGAGGCCTGCCTGGGAGGGGGCCCTGAGCCAGGAAATAAACATTTACTAACTGTACAAAGACC  
TTGTCCCTGCTGCTGGGAGCCTGCCAAGTGGTGGAGACAGGACTAGTG**CACGA**ATGATGGAAAGGGAGG  
GTTGGGGTGGGTGGGAGCCAGCCCTTTTCCCTCATAAGGGCCCTAGGACACCATACCGATGGAACCTGGGGG  
TACTGGGAGGTAACCTAGCACCTCCACCAAACCACAGCAACATGTGCTGAGGATGGGGCTGACTAGGTA  
AGCTCCCTGGAGCGTTTTTGGTTAAATTGAGGGAAATTGCTGCATTCCCATTCTCAGTCCATGCCTCCACA  
GAGGCTATGCCAGCTGTAGGCCAGACCCTGGCAAGATCTGGGTGGATAATCAGACTGACTGGTCCCCTC  
TCCCCACAGGCCTCAGAGCCCCAACTTTGTTCCCTGGGGCAGCCTGGAAATAGCCAGGTGAGAAACCAGC  
TAGGAATTTTTTCCAAGCTGCTTCTATATGCAAGAATGGGATGGGGCCTTTGGGAGCAGTTAGGGAAGAT  
GTGGAGAGTTGGAGGAAAAGGGGGCTTGGAGGTAAGGGAGGGGACTGGGGGAAGGATAGGGGAGAAGCTG  
TGAGCCTGGAGAAGTAGCCAAGGGATCCTGAGGGAATGGGGGAGCTGAGACGAAACCCCATTTCTATTC  
AGAAGATGAGCTATGAGTCTGGGCTTGGGCTGATAGAAGCCTTGCCCTGGCCTGGTGGGAGCTCTGGG  
CAGCTGGCTACAGACGTTCCCTTAGTGCTGGCGGGTAGGTTTGAA**TcATCACGCAg**GCCCTGGCCTCCAC  
CCGCCCCCACCAGCCCCCTGGCCTCAGTTCCTTGCAACATCTGGGGTGGGGGGGAGCAGGAACAAGG  
GCCTCTGTCTGCCCAGCTGCCTCCCCCTTTGGGTTTTGCCAGACTCCACAGTGC**aTaCGTGgGct**CCAAC  
AGGTCTCTTCCCTCCCAGTCACTGACTAACCCCGAACCACAGCTTCCCGTTCTCAGTCCACAAAC  
TTGGTGCCAAATTCTTCTCCCTGGGAAGCATCCTGGACACTTCCCAAAGGACCCAGTCACTCCAGCC  
TGTTGGCTGCCGCTCACTTTGATGTCTGCAGGCCAGATGAGGGCTCCAGATGGCACATTGTCAGAGGGAC  
ACACTGTGGCCCCCTGTGCCAGCCCTGGGCTCTCTGTACATGAAGCAACTCCAGTCCCAAATATGTAGCT  
GTTTGGGAGGTCAGAAATAGGGGGTCCAGGAGCAAACCTCCCCCACCCTTTCCAAAGCCCATTTCCCTC  
TTTAGCCAGAGCCGGGTGTGCAGACGGCAGTCACTAGGGGGCGCTCGGCCACCACAGGGAAGCTGGGTG  
AATGGAGCGAGCAGCGTCTTCGAGAGTGA**GGaCGTgtGTG**TCTGTGTGGGTGAGTGAGT**GTGTGCGTgtG**  
**gG**TTGAGGGCGTTGGAGCGGGGAGAAGGCCAGGGGTCACTCCAGGATTCCAATAGATCTGTGTGTCCCT  
CTCCCCACCCGTCCCTGTCCGGCTCTCCGCCTTCCCTGCCCTTCAATATTCCTAGCAAAGAGGGAAC  
GGCTCTCAGGCCCTG**TcCGCACgtAA**CCTCACTTTCCTGCTCCCTCCTCGCCAATGCCCCGCGGGCGCGT  
GTCTCTGGACAGAGTTTCCGGGGCGGATGGGTAATTTTTCAGGCTGTGAACCTTGGTGGGGGTGAGCTT  
CCCCCTTCAATTGCGGGGGCTGCGGGCCAGGCTTCACTGAGCGTCCGCAGAGCCCGGGCCGAGCCG**CGTG**  
**tGgA**AGGGCTGAGGCTCGCTGTCCCCGCCCCCGGGGCGGGCGGGGGCGGGTCCCAGCGGGGCGGAG  
CCATGCGCCCCCCCCCTTTTTTTTTTAAAAGTCGGCTGGTAGCGGGGAGGATCGCGGAGGCTTGGGGCAGC  
CGGGTAGCTCGGA**GGTcGTGgGgc**TGGGGGCTAGCACCAGCGCTCTGTGGGAGGCGCAGCGTTAGGTG  
GACCGGTACAGCGGACTCACCGGCCAGGGCGCTCGGTGCTGGAATTTGATATTCATTGATCCGGGTTTTAT  
CCCTCTTCTTTTTTCTTAAACATTTTTTTTTTAAACTGTATTGTTTCTCGTTTAAATTTATTTTGCTTG  
CCATTCCCCACTTGAATCGGGCCGACGGCTTGGGGAGATTGCTCTACTTCCCCAAATCACTGTGGATTTT  
GGAAACCAGCAGAAAGAGGAAAGAGGTAGCAAGAGCTCCAGAGAGAAGTCGAGGAAGAGAGAGACGGGGT  
CAGAGAGAGCGCG**GGGCGTGCGAG**CAGCGAAAGCGACAGGGGCAAAGTGAGTGACCTGCTTTTGGGGGT  
GACCGCCGAGCG**cGGCGTGAGcc**CTCCCCCTTGGGATCCCGCAGCTGACCAGTCGCGTGACGGACAGA  
CAGACAGACACCGCCCCCAGCCCCAGCTACCACCTCCTCCCCGCGCGGGCGGACAGTGAGCGCGCGG  
CGAGCCGCGGGCAGGGGCGGAGCCCCGCGCCGAGGCGGGGTGGAGGGGTTCGGGGCTCGCGCGCTCGC  
ACTGAAACTTTTCGTCCAACCTTCTGGGCTGTTCTCGCTTCGGAGG**aGcCGTGgTcc**GCGCGGGGAAGCC

```

GAGCCGAGCGGAGCCGCGAGAAGTGCTAGCTCGGGCCGGGAGGAGCCGCGAGCCGGAGGAGGGGAGGAGG
AAGAAGAGAAGGAAGAGGAGAGGGGGCCGAGTGGCGACTCGGCGCTCGGAAGCCGGGCTCATGGACGGG
TGAGGCGGCGGTGTGCGCAGACAGTGCTCCAGCCGCGCGCTCCCCAGGCCCTGGCCCGGGCCTCGGGC
CGGGGAGGAAGAGTAGCTCGCCGAGGCGCCGAGGAGAGCGGGCCGCCCCACAGCCCGAGCCGGAGAGGGA
GCGCGAGCCGCGCCGGCCCCGGTCGGGCCTCCGAAACCATGAAC+1043

```

#### Positioning of putative DREs relative to the transcription start site

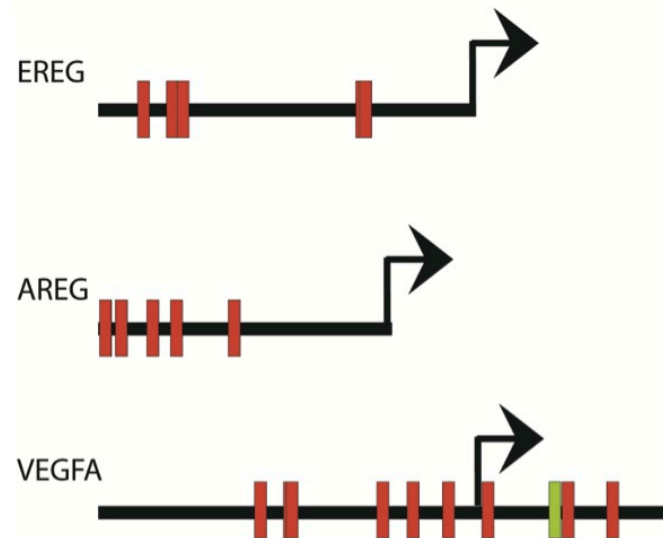

**Supplementary figure 2. GNF351 inhibits cytokine-induced MMP-2 and -9 expression in primary fibroblast-like synoviocytes.** RA-FLS were pretreated for 1 h with 500 nM GNF351 followed by a single administration of 10 ng/ml IL1B for 48 h. Cells were then treated every 12 h with 500 nM GNF351 for a total of 48 h. Cell culture supernatants were collected and a gelatin zymography was performed.

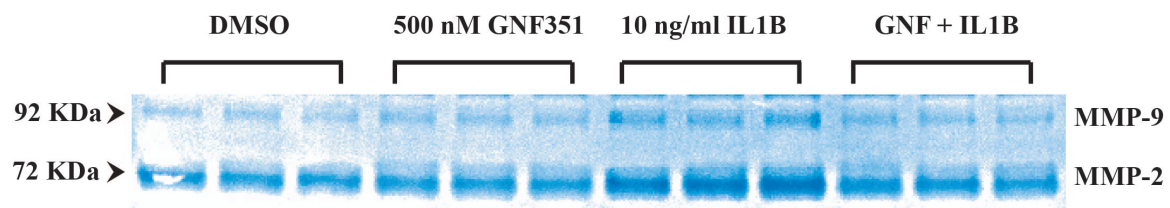

Supplement: supp_113.209726_jpet209726_suppl_figures.pdf [file supp_113.209726_jpet209726_suppl_figures.pdf]
